# Supplementary material for: Assessing Self-Awareness through Gaze Agency
Source: PLoS One. 2016 Nov 3;11(11):e0164682. doi: 10.1371/journal.pone.0164682 (PMC5094589; doi:10.1371/journal.pone.0164682)
Supplement: S3 Data — (XLSX) [file pone.0164682.s003.xlsx]

## Sheet: DataOut 
	DataOut (1,1)	DataOut (1,2)	DataOut (1,3)	DataOut (1,4)	DataOut (1,5)	DataOut (1,6)	DataOut (1,7)	DataOut (1,8)	DataOut (1,9)	DataOut (1,10)	DataOut (1,11)	DataOut (1,12)	DataOut (1,13)	DataOut (1,14)	DataOut (1,15)	DataOut (1,16)	DataOut (1,17)	DataOut (1,18)	DataOut (1,19)	DataOut (1,20)	DataOut (1,21)	DataOut (1,22)	DataOut (1,23)	DataOut (1,24)	DataOut (1,25)	DataOut (1,26)	DataOut (1,27)	DataOut (1,28)	DataOut (1,29)	DataOut (1,30)
Accuracy	0.775	0.825	0.825	0.875	0.7	1	0.65	0.725	0.675	0.975	0.875	1	0.525	0.825	0.975	0.925	0.65	0.65	0.725	0.85	0.7	0.925	0.55	0.6	0.625	0.575	0.775	0.875	0.75	0.8
Confidence	0.855	0.945	0.835	0.85	0.49	0.99	0.7	0.69	0.6	0.725	0.54	0.79	0.705	0.745	0.865	0.855	0.435	0.525	0.565	0.645	0.34	0.555	0.455	0.305	0.66	0.555	0.805	0.96	0.445	0.635
Dprime	17937	18832	18832	23624	10628	45019	0.7509	12475	0.9025	37976	22283	45019	0.7043	20571	37976	27745	0.8779	0.7509	11912	22021	11231	32514	0.247	0.5104	0.6554	0.4084	14712	29063	13262	16315
Bias	11655	-0.539	-0.539	0.8633	-0.3022	0	0	0.47	-0.1843	-13373	0.2533	0	-13373	10658	13373	0.4423	-0.493	0	-0.2623	-0.9813	-0.493	-20328	0.0305	-0.1303	-0.2148	-0.1843	-0.1179	-23185	-0.2025	0
StrengthHITS	0.8944	0.9641	0.8852	0.8637	0.9302	0.8121	0.8986	0.893	0.8305	0.8948	0.848	0.8958	1	0.8952	0.9015	0.8842	0.8957	0.8673	0.9331	0.8647	0.9079	0.881	0.8643	0.8734	0.8746	0.9341	0.8133	0.8374	0.9077	0.8269
DelayHITS	167402	167431	167999	167415	16744	167384	167481	167455	167423	16741	167457	167423	167398	167412	167383	167412	167416	167406	167394	167419	167436	167408	167424	167414	167392	167413	167399	167389	167401	16741
StrengthMISS	1	0.9553	0.8918	0.9091	0.9159	NaN	0.8832	0.9013	0.8614	1	0.8877	NaN	0.8963	0.8929	NaN	0.8667	0.9115	0.8543	0.9009	0.8633	0.9398	0.9052	0.8735	0.8833	0.9364	0.9089	0.8827	0.8605	0.9126	0.8671
DelayMISS	167402	167431	168148	167401	167431	NaN	167482	167454	16742	167387	167434	NaN	167424	167434	NaN	167411	16.74	167421	167423	167432	167428	16748	167414	16742	16741	16744	16742	167386	167419	167398
StrengthFA	0.1661	0.1562	0.1071	0.1975	0	NaN	0.1156	0.127	0.1436	NaN	0.0694	NaN	NaN	0.0704	0	0.2119	0.1735	0.1119	0.1402	0	0.0972	NaN	0.1533	0.1064	0.1758	0.0838	0.1392	NaN	0.1672	0.1551
DelayFA	15776028	-21346396	-2676868	-8118526	-251612	NaN	4880307	-2010005	-11853464	NaN	1004421	NaN	NaN	-4101942	1171922	-1732.5	2567069	-7722992	3055146	-502218	-2788303	NaN	3030402	3432258	-501881	3382207	7450372	NaN	460371	1004588
StrengthCR	0.1264	0.1181	0.1237	0.1943	0.0992	0.1486	0.1007	0.1404	0.0952	0.1334	0.1716	0.1378	0.0845	0.127	0.1089	0.1692	0.0841	0.1436	0.1413	0.1691	0.1399	0.1305	0.1171	0.1529	0.1525	0.1367	0.157	0.1653	0.1158	0.0639
DelayCR	1074155	-3069407	-1352665	-2710467	-5682069	-2175092	5435876	4785751	2041746	1206624	5614135	-5264645	1423766	-7115239	1497036	3477602	5218262	270381	-6663639	-1391767	7494978	-1038666	-1155105	-2044375	-4520326	-6072628	286886	-9960865	633957	2050909
SaccamplHITS	37568	23186	45153	33419	45815	39522	41474	31417	19344	36924	40977	39248	60558	41752	46805	45689	30897	33744	51893	30655	37268	35039	26871	43163	41084	28665	28911	27046	44927	34959
SaccfreqHITS	20842	0.88	17933	20158	1175	1.94	10846	15471	1925	17579	15833	1315	1.7	14421	1.34	16737	1.9	21615	12846	1.86	15455	15824	2.5	1.93	2.01	0.9	1.58	1.58	24214	17188
FixdurHITS	1406842	170	1280667	1573158	1841667	154.85	1503077	1476471	127.75	129	1827222	166.75	137	158	172.2	1381579	1158889	1334615	1481538	1170667	1522727	1542353	140.5	130.1	125	299375	1377333	1488667	1282857	1378125
SmoothdwellHITS	140605	131178	135267	66333	100931	86233	220282	130363	188514	123281	56093	73417	29.05	90307	107825	187605	241093	82923	81731	111878	60864	121588	66361	150917	84033	52292	72289	69556	316274	60156
SaccamplMISS	19661	25185	36891	32866	41816	NaN	31521	34388	21327	36059	2549	NaN	4318	25214	NaN	32953	28422	29339	35706	29412	35415	33782	31054	3611	33988	27304	18078	24721	46938	3152
SaccfreqMISS	1.6	1.18	1.92	1.9	18375	NaN	11857	1.7	1.8	1.3	2.35	NaN	2.1	2.3	NaN	2.1	18818	24143	1.9	1.88	16667	12333	2.85	1.89	2.04	13167	1.72	1.84	25667	2.3
FixdurMISS	143	167.8	155.4	201	143	NaN	1462857	1186667	134625	143	121.5	NaN	1105263	132	NaN	108	1125455	1387143	1281429	128.2	1428889	1496667	129.75	137.2	131	1978333	142.6	122.6	1123333	138.75
SmoothdwellMISS	41833	122333	69933	0.9	203229	NaN	102952	176222	137437	14	14.85	NaN	158605	13.05	NaN	333667	169212	120024	164119	114867	101963	116722	113958	110583	126367	63569	58467	168667	329194	84125
SaccamplFA	3025	27596	50516	31229	41912	NaN	33177	30784	2121	NaN	40885	NaN	NaN	2921	41931	35652	21882	29451	26619	23442	37033	NaN	27031	37993	32017	33842	17651	NaN	46355	29749
SaccfreqFA	1.6	1.1	1.65	1.75	1.3	NaN	0.9429	14625	1.46	NaN	19333	NaN	NaN	1.4	0.5	1.5	22667	20571	1.75	2.1	2.2	NaN	2.58	21167	2.06	1.4	2225	NaN	2.45	2175
FixdurFA	190375	173.5	127	166.75	186.25	NaN	1608571	147	127.2	NaN	1313333	NaN	NaN	1783333	258	113	101	1328571	115.75	135	1403333	NaN	144.7	1283333	142	221.2	125.5	NaN	127.75	129.25
SmoothdwellFA	86104	42583	97083	14625	172958	NaN	109881	96771	10.27	NaN	89111	NaN	NaN	4975	84667	188167	174889	115333	14625	25.25	74778	NaN	106283	111639	7.04	63067	31833	NaN	188333	154375
SaccamplCR	31199	23297	45197	37034	42359	41131	34772	23473	25319	35912	39914	27332	38116	32224	36194	39587	27114	2497	42922	3026	32255	32137	29964	39908	37523	38135	22904	27753	43025	33258
SaccfreqCR	14833	10556	17278	18312	14875	1595	0.9308	14917	1.86	1565	18765	1.22	2035	13857	12737	15611	1.8	21615	15125	1.9	16588	1.58	2.51	17857	21133	1.38	15188	1715	22937	18875
FixdurCR	1429167	1521667	1325556	155375	153.5	155.4	1412308	1661667	130	142.1	1321176	193.2	116.35	1727143	172	1365556	1238824	1303846	157.5	1291579	1463529	172.65	135.6	1261429	1310667	196.6	1685625	157.75	1208125	1428125
SmoothdwellCR	80458	157426	145704	72177	146219	64808	187295	110431	122211	109375	67147	71808	181142	75583	103526	131685	153608	95577	86323	114544	79471	95875	94117	147821	90744	61133	71865	76983	310562	8026
